# Supplementary material
Source: MDPI journal article supplement (https://www.mdpi.com/1999-4907/14/8/1680)
Supplement: s1 [file s1]

## Supplementary data:

**Table S1.** The tests of between-subjects effects for dependent variable REC.

| Source          | Type III Sum of Squares | df | Mean Square | F         | Sig.  |
|-----------------|-------------------------|----|-------------|-----------|-------|
| Corrected Model | 13717.806*              | 19 | 721.990     | 717.935   | 0.000 |
| Intercept       | 42145.071               | 1  | 42145.071   | 41908.358 | 0.000 |
| F               | 488.253                 | 3  | 162.751     | 161.837   | 0.000 |
| T               | 12301.858               | 4  | 3075.464    | 3058.191  | 0.000 |
| F * T           | 927.695                 | 12 | 77.308      | 76.874    | 0.000 |
| Error           | 40.226                  | 40 | 1.006       |           |       |
| Total           | 55903.102               | 60 |             |           |       |
| Corrected Total | 13758.032               | 59 |             |           |       |

\* R<sup>2</sup> =0.997 (Adjusted R<sup>2</sup> = 0.996)

**Table S2.** The tests of between-subjects effects for dependent variable MDA.

| Source          | Type III Sum of Squares | df | Mean Square | F         | Sig.  |
|-----------------|-------------------------|----|-------------|-----------|-------|
| Corrected Model | 122.766*                | 19 | 6.461       | 35.188    | 0.000 |
| Intercept       | 5160.239                | 1  | 5160.239    | 28102.051 | 0.000 |
| F               | 35.310                  | 3  | 11.770      | 64.099    | 0.000 |
| T               | 11.721                  | 4  | 2.930       | 15.958    | 0.000 |
| F * T           | 75.735                  | 12 | 6.311       | 34.370    | 0.000 |
| Error           | 7.345                   | 40 | 0.184       |           |       |
| Total           | 5290.350                | 60 |             |           |       |
| Corrected Total | 130.111                 | 59 |             |           |       |

\* R<sup>2</sup> =0.944 (Adjusted R<sup>2</sup> = 0.917)

**Table S3.** The tests of between-subjects effects for dependent variable Pro.

| Source          | Type III Sum of Squares | df | Mean Square | F        | Sig.  |
|-----------------|-------------------------|----|-------------|----------|-------|
| Corrected Model | 139822.849*             | 19 | 7359.097    | 58.846   | 0.000 |
| Intercept       | 846642.464              | 1  | 846642.464  | 6770.076 | 0.000 |
| F               | 26544.081               | 3  | 8848.027    | 70.752   | 0.000 |
| T               | 49978.629               | 4  | 12494.657   | 99.912   | 0.000 |
| F * T           | 63300.139               | 12 | 5275.012    | 42.181   | 0.000 |
| Error           | 5002.263                | 40 | 125.057     |          |       |
| Total           | 991467.576              | 60 |             |          |       |
| Corrected Total | 144825.112              | 59 |             |          |       |

\* R<sup>2</sup> =0.965 (Adjusted R<sup>2</sup> = 0.949)

**Table S4.** The tests of between-subjects effects for dependent variable SS.

| Source          | Type III Sum of Squares | df | Mean Square | F        | Sig.  |
|-----------------|-------------------------|----|-------------|----------|-------|
| Corrected Model | 202.232*                | 19 | 10.644      | 9.188    | 0.000 |
| Intercept       | 9969.899                | 1  | 9969.899    | 8605.919 | 0.000 |
| F               | 39.387                  | 3  | 13.129      | 11.333   | 0.000 |
| T               | 88.855                  | 4  | 22.214      | 19.175   | 0.000 |
| F * T           | 73.990                  | 12 | 6.166       | 5.322    | 0.000 |
| Error           | 46.340                  | 40 | 1.158       |          |       |
| Total           | 10218.471               | 60 |             |          |       |
| Corrected Total | 248.572                 | 59 |             |          |       |

\* R<sup>2</sup> =0.997 (Adjusted R<sup>2</sup> = 0.996)**Table S5.** The tests of between-subjects effects for dependent variable SP.

| Source          | Type III Sum of Squares | df | Mean Square | F         | Sig.  |
|-----------------|-------------------------|----|-------------|-----------|-------|
| Corrected Model | 75.002*                 | 19 | 3.947       | 57.452    | 0.000 |
| Intercept       | 2390.986                | 1  | 2390.986    | 34798.219 | 0.000 |
| F               | 22.236                  | 3  | 7.412       | 107.872   | 0.000 |
| T               | 30.754                  | 4  | 7.689       | 111.899   | 0.000 |
| F * T           | 22.012                  | 12 | 1.834       | 26.697    | 0.000 |
| Error           | 2.748                   | 40 | 0.069       |           |       |
| Total           | 2468.736                | 60 |             |           |       |
| Corrected Total | 77.751                  | 59 |             |           |       |

\* R<sup>2</sup> =0.965 (Adjusted R<sup>2</sup> = 0.948)**Table S6.** The tests of between-subjects effects for dependent variable SOD.

| Source          | Type III Sum of Squares | df | Mean Square  | F        | Sig.  |
|-----------------|-------------------------|----|--------------|----------|-------|
| Corrected Model | 287150.944*             | 19 | 15113.208    | 5.732    | 0.000 |
| Intercept       | 10958057.421            | 1  | 10958057.421 | 4155.857 | 0.000 |
| F               | 29595.248               | 3  | 9865.083     | 3.741    | 0.018 |
| T               | 204283.766              | 4  | 51070.942    | 19.369   | 0.000 |
| F * T           | 53271.930               | 12 | 4439.327     | 1.684    | 0.108 |
| Error           | 105470.978              | 40 | 2636.774     |          |       |
| Total           | 11350679.343            | 60 |              |          |       |
| Corrected Total | 392621.922              | 59 |              |          |       |

\* R<sup>2</sup> =0.731 (Adjusted R<sup>2</sup> = 0.604)

**Table S7.** The tests of between-subjects effects for dependent variable POD.

| Source          | Type III Sum of Squares | df | Mean Square | F         | Sig.  |
|-----------------|-------------------------|----|-------------|-----------|-------|
| Corrected Model | 913848.096*             | 19 | 48097.268   | 852.104   | 0.000 |
| Intercept       | 2851788.811             | 1  | 2851788.811 | 50523.022 | 0.000 |
| F               | 646037.429              | 3  | 215345.810  | 3815.122  | 0.000 |
| T               | 170253.803              | 4  | 42563.451   | 754.065   | 0.000 |
| F * T           | 97556.864               | 12 | 8129.739    | 144.029   | 0.000 |
| Error           | 2257.813                | 40 | 56.445      |           |       |
| Total           | 3767894.720             | 60 |             |           |       |
| Corrected Total | 916105.909              | 59 |             |           |       |

\* R<sup>2</sup> =0.998 (Adjusted R<sup>2</sup> = 0.996)
